# Supplementary material for: Comparative genome sequence analysis underscores mycoparasitism as the ancestral life style of Trichoderma
Source: Genome Biol. 2011 Apr 18;12(4):R40. doi: 10.1186/gb-2011-12-4-r40 (PMC3218866; doi:10.1186/gb-2011-12-4-r40)
Supplement: Additional file 1 — Comparative properties and gene inventory of T. reesei, T. virens and T. atroviride. This file contains additional information on genomic properties and selected gene families from the three Trichoderma species comprising 19 tables. Table S1 summarizes the satellite sequences identified in the Trichoderma genomes and four other fungal genomes. Table S2 summarizes manually curated sequence alignments of transposable element families from the Trichoderma genomes. Table S3 lists the total number of CAZy families in Trichoderma and other fungi. Table S4 lists the glycoside hydrolase (GH) families in Trichoderma and other fungi. Table S5 lists the glycosyltransferase (GT) families in Trichoderma and other fungi. Table S6 lists the polysaccharide lyase (PL) families in Trichoderma and other fungi. Table S7 lists the carbohydrate esterase (CE) families in Trichoderma and other fungi. Table S8 lists the carbohydrate-binding module (CBM) families in Trichoderma and other fungi. Table S9 lists the NRPS, PKS and NRPS-PKS proteins in T. atroviride. Table S10 lists NRPS, PKS and NRPS-PKS proteins in T. virens. Table S11 lists the putative insecticidal toxins in Trichoderma. Table S12 lists the cytochrome P450 CYP4/CYP19/CYP26 class E proteins in Trichoderma. Table S13 lists the small-cysteine rich secreted protein from Trichoderma spp. Table S14 lists the most abundant PFAM domains in those genes that are unique to T. atroviride and T. virens and not present in T. reesei. Table S15 surveys the assembly statistics. Table S16 provides gene model support. Table S17 summarizes gene model statistics. Table S18 provides numbers of genes with functional annotation according to KOG, Gene Ontology, and KEGG classifications. Table S19 lists the largest KOG families responsible for metabolism. [file gb-2011-12-4-r40-S1.XLSX]

## Sheet: Table S1
Comparative genome sequence analysis underscores mycoparasitism as the ancestral life style of Trichoderma
Additional File 1
Table S1. Summary of satellite sequences identified in the Trichoderma genomes and four other fungal genomes.
	Number of micro/mini satellite loci	number of bases	genome size	satellite % of genome
T. atroviride	5249	338170	36087449	0.94%
T. reesei	7743	513710	33454791	1.54%
T. virens	7145	509050	38773199	1.31%
Other Sordariomycetes
Magnaporthe oryzae	5569	315931	41695457	0.76%
Neurospora crassa	9893	574523	39225835	1.46%
Chaetomium globosum	5475	336267	34886939	0.96%
Eurotiomycetes
Aspergillus nidulans	2371	160601	30483994	0.53%

## Sheet: Table S2
Table S2: Summary of manually curated sequence alignments of transposable element families from the Trichoderma genomes,
	TA/AT ratio	CT+AT/ AC+GT ratio	RIP*	number of sequences	alignment length	% identity	transitions	transversions	transition/ transversion ratio
T. atroviride
LTR-Gypsy	1.46	0.42	*	7	1255	90	559	28	19.96
LINE-R1	8.23	1.64		7	274	86.3	96	87	1.1
T. reesei
LTR-Copia	1.46	0.77	*	3	972	94.4	84	1	84
LTR-Gypsy	1.53	0.26	*	2	1374	91	93	31	3
LINE-R1	0.5	2.22		5	808	64	311	650	0.48
LINE-Tad1	1.58	0.9	*	4	3591	88.1	848	0	na
T. virens
LTR-Copia	1.46	0.77	*	3	1382	91.4	84	1	84
LTR-Gypsy	1.44	0.38	*	3	1008	84.1	263	3	87.67
LINE-R1	0.75	3.17		4	70	78.7	44	36	1.22
LINE-Tad1	1.55	0.91	*	6	3557	92.5	564	0	na

## Sheet: Table S3
Table S3. Total number of CAZy families*. The three Trichoderma spp. appear in bold.
	GH	GT	PL	CE	CBM
Trichoderma atroviride	242	96	8	25	62
Trichoderma virens	256	98	6	25	87
Trichoderma reesei	193	93	5	17	41
Aspergillus nidulans	251	91	21	31	41
Aspergillus niger	243	110	8	24	40
Fusarium graminearum	247	102	21	44	64
Laccaria bicolor	163	88	7	17	26
Magnaporthe grisea	232	92	5	48	65
Nectria haematococca	331	117	33	44	63
Neurospora crassa	173	76	4	23	42
Penicillium chrysogenum	216	101	9	22	49
Phanerochaete chrysosporium	181	66	4	17	47
Podospora anserina	226	86	7	41	97
Postia placenta	248	102	8	25	34
Saccharomyces cerevisiae	46	68	0	3	12
Schizosaccharomyces pombe -	47	61	0	5	8
Tuber melanosporum	91	96	3	14	26
Filamentous ascomycetes: Trichoderma atroviride IMI 206040, T. virens Gv29-8, T. reesei (Hypocrea jecorina) QM6a, Aspergillus nidulans FGSC A4, Aspergillus niger CBS 513.88, Gibberella zeae PH-1, Magnaporthe grisea 70-15, Nectria haematococca mpVI, Neurospora crassa OR74A, Penicillium chrysogenum Wisconsin 54-1255, Podospora anserina S mat+, Tuber melanosporum. Yeasts (ascomycetes): Saccharomyces…
Abbreviations: GH, glycosyl hydrolase; GT, glycosyltransferase; PL, pectate lyase; CE, carbohydrate esterase; CBM, carbohydrate binding domain

## Sheet: Table S4
Table S4. Glycoside hydrolase (GH) families. For more explanations see legend to supplementary Figure S12.
GH	1	2	3	5	6	7	9	10	11	12	13	15	16	17	18	20	23	24	25	26	27	28	29	30	31	32	33	35	36	37	38	39	42	43	45	47	49	51	53	54	55	61	62	63	64	65	67	71	72
Trichoderma atroviride	4	10	14	14	1	2	0	1	4	3	5	3	17	5	29	3	1	0	1	0	9	6	0	2	7	1	0	1	2	2	1	2	0	5	1	8	0	1	0	2	8	3	2	1	3	2	2	4	5
Trichoderma virens	2	11	17	16	1	2	0	2	4	4	6	2	17	4	36	3	0	1	1	2	10	6	0	2	5	1	0	1	2	2	2	1	0	3	2	8	1	0	0	2	10	3	3	1	3	2	2	5	6
Trichoderma reesei	2	7	13	11	1	2	0	1	4	2	5	2	16	4	20	3	0	1	1	0	8	4	0	2	4	0	0	1	2	2	1	1	0	2	1	8	0	0	0	2	6	3	1	1	3	2	1	4	5
Aspergillus nidulans	3	10	20	15	2	3	0	3	2	1	13	2	13	5	19	2	0	1	3	3	3	9	0	0	10	2	0	4	4	1	1	1	0	15	1	7	0	2	1	1	6	9	2	1	0	1	1	5	5
Aspergillus niger	3	6	17	10	2	2	0	1	4	4	18	2	13	5	14	3	0	0	0	1	5	21	1	1	7	6	0	5	2	1	1	0	0	10	0	5	0	4	2	1	3	7	1	1	0	1	1	7	7
Fusarium graminearum	3	10	22	15	1	2	0	5	3	4	8	3	21	6	19	2	0	0	0	0	2	6	1	0	8	5	0	3	3	2	1	2	0	17	1	11	0	2	1	1	3	15	1	1	2	0	1	0	3
Laccaria bicolor	0	2	2	22	0	0	1	0	0	3	8	2	31	4	10	2	1	3	0	0	1	6	0	8	5	0	0	1	0	2	1	0	0	0	0	9	0	0	0	0	2	8	0	1	0	0	0	4	8
Magnaporthe grisea	2	6	19	13	3	6	0	5	5	3	10	2	16	7	14	2	0	1	0	0	4	3	4	1	5	5	0	0	2	2	2	1	0	19	1	6	0	3	1	1	3	17	3	2	1	0	1	0	4
Nectria haematococca	5	11	38	18	1	3	0	3	3	6	9	2	21	6	28	4	1	3	0	0	2	11	0	0	9	6	1	8	2	2	1	1	0	32	1	10	1	4	1	1	5	12	2	1	2	0	0	5	3
Neurospora crassa	1	5	9	7	3	5	0	4	2	1	10	2	14	4	12	0	0	0	1	1	0	2	0	1	5	1	0	2	1	2	1	0	0	7	1	8	0	1	1	1	6	14	0	1	2	0	1	6	5
Penicillium chrysogenum	3	6	17	13	1	2	0	3	1	3	16	3	16	5	9	2	0	0	1	1	1	5	0	1	11	7	1	2	2	1	1	2	1	14	0	6	0	3	1	1	3	4	1	1	2	1	1	6	6
Phanerochaete chrysosporium	2	2	11	20	1	9	1	6	1	2	9	2	23	2	11	3	0	0	1	0	3	4	0	1	6	0	0	3	0	2	1	0	0	4	0	6	0	2	1	0	2	15	0	1	0	0	0	3	1
Podospora anserina	1	7	11	15	4	6	0	8	6	2	9	3	12	4	20	1	0	1	0	1	2	0	0	0	5	0	0	1	1	2	1	0	0	10	2	9	0	1	1	0	7	33	2	1	1	0	1	3	6
Postia placenta	4	6	9	36	0	0	0	4	0	4	11	3	39	4	20	6	2	0	0	0	3	11	0	6	7	0	0	2	0	12	2	0	0	1	0	9	0	3	2	0	6	4	0	3	0	0	0	5	4
Saccharomyces cerevisiae	0	0	0	5	0	0	0	0	0	0	9	1	5	4	2	0	0	0	0	0	0	1	0	0	1	1	0	0	0	2	1	0	0	0	0	3	0	0	0	0	0	0	0	1	0	1	0	0	5
Schizosaccharomyces pombe -	0	0	1	3	0	0	0	0	0	0	13	2	3	1	1	0	0	0	0	0	1	0	0	0	4	2	0	0	0	1	1	0	0	0	0	2	0	0	0	0	0	0	0	1	0	0	0	2	4
Tuber melanosporum	2	2	6	6	0	0	0	1	0	1	8	1	7	4	5	2	0	1	1	0	0	2	0	0	5	1	0	0	2	0	1	0	0	1	1	5	0	0	0	0	2	4	0	1	0	1	0	0	4
[truncated: 18 more columns]

## Sheet: Table S5
Table S5. Glycosyltransferase (GT)-families. For more explanations see legend to supplementary Table S4.
GT	1	2	3	4	5	8	15	17	20	21	22	24	25	31	32	33	34	35	39	41	48	49	50	55	57	58	59	61	62	64	66	69	71	76	90	*	Total
Trichoderma atroviride	7	13	1	5	0	3	4	1	5	1	4	1	0	9	9	1	2	1	3	1	1	0	1	0	2	1	1	0	3	2	1	4	1	1	7	2	98
Trichoderma virens	8	15	1	5	0	4	4	1	4	1	4	1	1	8	9	1	2	1	3	1	0	0	1	0	2	1	1	1	3	2	1	4	1	1	6	2	100
Trichoderma reesei	8	14	1	5	0	3	4	1	4	1	4	1	1	6	8	1	2	1	3	1	1	0	1	0	2	1	1	0	3	2	1	4	1	1	6	10	103
Aspergillus nidulans	9	12	1	7	2	4	3	0	3	1	4	1	4	5	7	1	3	1	3	1	1	0	1	0	2	1	1	0	3	0	1	3	2	2	2	0	91
Aspergillus niger	10	16	1	8	5	4	3	0	6	1	3	1	5	6	11	1	3	1	3	1	1	0	1	0	2	1	1	0	3	0	1	6	4	1	0	3	113
Fusarium graminearum	15	19	1	5	0	6	5	1	3	1	4	1	0	5	5	1	2	1	3	1	1	0	1	0	2	1	1	0	2	2	1	1	4	1	6	8	110
Laccaria bicolor	4	20	1	6	5	6	5	1	4	1	3	1	0	1	1	1	0	1	6	0	2	0	1	0	2	1	1	0	0	0	1	4	0	1	8	7	95
Magnaporthe grisea	12	8	1	4	1	2	4	1	3	1	4	1	4	3	8	1	2	1	3	1	1	0	1	1	2	1	1	3	2	0	1	4	4	1	5	2	94
Nectria haematococca	20	20	1	6	0	6	5	1	3	1	4	1	0	5	9	1	2	1	3	1	2	0	1	0	2	1	1	0	3	2	1	5	3	1	5	15	132
Neurospora crassa	6	11	1	6	2	2	5	1	3	1	3	1	1	3	4	1	2	1	3	1	1	0	1	1	2	1	1	0	3	0	1	2	1	1	3	2	78
Penicillium chrysogenum	6	13	1	5	4	5	3	0	9	1	4	1	3	6	9	1	3	1	3	1	1	0	1	0	2	1	1	0	3	0	1	2	3	1	6	0	101
Phanerochaete chrysosporium	6	13	1	4	1	9	2	1	3	1	2	1	0	1	1	1	0	1	3	1	2	1	1	0	2	1	1	0	0	0	1	3	0	1	1	3	69
Podospora anserina	7	16	1	5	2	3	5	1	3	1	4	1	1	5	5	1	2	1	3	1	1	0	1	1	2	1	1	0	3	0	1	3	0	1	3	3	89
Postia placenta	6	27	3	7	1	7	4	0	6	1	5	2	0	1	1	2	0	2	5	0	2	2	2	0	2	0	1	0	0	0	2	7	0	2	2	11	113
Saccharomyces cerevisiae	2	5	2	3	0	3	9	0	5	0	4	1	0	0	4	1	2	1	7	0	3	0	1	0	2	1	1	0	3	0	1	0	6	1	0	0	68
Schizosaccharomyces pombe -	1	4	0	3	5	3	6	0	5	0	4	1	0	1	4	1	7	0	3	0	4	0	1	0	2	1	1	0	2	0	1	0	0	1	0	0	61
Tuber melanosporum	5	10	1	38	1	2	5	0	3	1	4	1	0	0	2	1	2	1	3	1	2	0	1	0	2	1	1	0	3	0	1	2	0	1	1	2	98

## Sheet: Table S6
Table S6. Polysaccharide lyase (PL)-families. For more explanations see legend to supplementary Table S4.
PL	1	3	4	7	8	9	11	14	20	Total
Trichoderma atroviride	2	0	0	3	1	0	0	0	2	8
Trichoderma virens	0	0	0	3	1	0	0	0	2	6
Trichoderma reesei	0	0	0	2	1	0	0	0	2	5
Aspergillus nidulans	8	5	4	0	0	1	1	0	2	21
Aspergillus niger	6	0	2	0	0	0	0	0	0	8
Fusarium graminearum	9	7	3	0	0	1	0	0	1	21
Laccaria bicolor	0	0	0	0	1	0	0	6	0	7
Magnaporthe grisea	2	1	1	0	0	0	0	0	1	5
Nectria haematococca	13	11	5	1	0	1	1	0	1	33
Neurospora crassa	1	1	1	0	0	0	0	0	1	4
Penicillium chrysogenum	5	1	3	0	0	0	0	0	0	9
Phanerochaete chrysosporium	0	0	0	0	1	0	0	3	0	4
Podospora anserina	4	2	1	0	0	0	0	0	0	7
Postia placenta	0	0	0	0	0	0	0	8	0	8
Saccharomyces cerevisiae	0	0	0	0	0	0	0	0	0	0
Schizosaccharomyces pombe -	0	0	0	0	0	0	0	0	0	0
Tuber melanosporum	2	0	1	0	0	0	0	0	0	3

## Sheet: Table S7
Table S7. Carbohydrate esterase (CE)-families. For more explanations see legend to supplementary Table S4.
CE	1	2	3	4	5	8	9	10	12	15	16	Total
Trichoderma atroviride	4	0	4	6	5	1	1	0	0	1	3	25
Trichoderma virens	5	0	3	4	6	2	1	0	0	1	3	25
Trichoderma reesei	3	0	2	4	4	0	1	0	0	1	2	19
Aspergillus nidulans	3	0	6	9	4	3	1	0	2	0	3	32
Aspergillus niger	3	0	1	7	5	3	1	0	2	0	2	25
Fusarium graminearum	5	1	5	9	12	6	1	0	3	0	2	44
Laccaria bicolor	1	0	0	11	1	3	0	0	0	0	1	20
Magnaporthe grisea	10	1	6	9	15	1	2	0	2	1	1	48
Nectria haematococca	2	1	11	9	7	7	2	0	2	0	3	45
Neurospora crassa	7	0	3	4	3	1	2	0	1	1	1	23
Penicillium chrysogenum	2	0	4	5	4	2	1	0	2	1	1	22
Phanerochaete chrysosporium	5	0	0	5	0	2	1	0	0	3	1	20
Podospora anserina	14	0	8	5	7	1	1	0	1	3	1	41
Postia placenta	0	0	0	7	0	4	3	0	0	2	9	26
Saccharomyces cerevisiae	1	0	0	2	0	0	0	0	0	0	0	3
Schizosaccharomyces pombe -	0	0	0	1	0	0	0	4	0	0	0	5
Tuber melanosporum	2	0	0	9	0	1	0	0	1	0	1	14

## Sheet: Table S8
Table S8. Carbohydrate-binding module (CBM)-families.
CBM	1	5	6	12	13	14	18	19	20	21	24	32	35	38	42	43	48	50	52	Total
Trichoderma atroviride	19	0	0	0	5	0	15	0	3	1	4	2	1	0	2	2	3	5	0	63
Trichoderma virens	23	0	0	0	6	0	25	0	1	1	6	2	1	0	2	3	3	14	0	87
Trichoderma reesei	15	0	0	0	3	0	8	0	1	1	4	0	0	0	2	1	0	6	0	42
Aspergillus nidulans	7	0	0	0	0	1	17	0	4	1	2	0	2	0	1	3	1	2	0	41
Aspergillus niger	8	0	0	0	1	1	13	0	1	1	6	0	1	0	1	4	3	0	0	40
Fusarium graminearum	12	0	1	0	2	0	35	0	2	2	1	4	2	0	1	1	1	0	0	64
Laccaria bicolor	1	2	0	1	10	0	1	1	1	2	0	0	0	0	0	6	1	0	0	26
Magnaporthe grisea	22	0	2	0	0	0	30	0	3	1	0	0	3	0	1	1	1	0	1	65
Nectria haematococca	15	0	0	0	0	0	27	0	2	2	6	3	2	1	1	1	3	0	0	64
Neurospora crassa	19	0	0	0	2	0	3	0	2	1	8	1	0	1	0	1	1	2	1	42
Penicillium chrysogenum	6	0	0	0	0	1	12	0	3	1	8	2	1	0	1	3	2	9	0	49
Phanerochaete chrysosporium	31	3	0	0	5	0	1	0	2	2	0	0	1	0	0	1	1	0	0	47
Podospora anserina	30	0	1	0	0	0	32	0	3	1	2	0	2	0	1	1	3	20	1	97
Postia placenta	0	5	0	1	8	0	2	6	2	3	0	0	1	0	0	4	2	0	0	34
Saccharomyces cerevisiae	0	0	0	0	0	0	2	1	0	4	0	0	0	0	0	2	3	0	0	12
Schizosaccharomyces pombe -	2	0	0	0	0	0	0	0	0	0	0	0	0	0	0	2	1	0	3	8
Tuber melanosporum	2	0	0	0	0	0	16	1	0	2	0	1	0	0	0	1	3	0	0	26

## Sheet: Table S9
Table S9. NRPS, PKS and NRPS-PKS proteins in T. atroviride
Name	Protein ID	Comments
NRPS1	40498	Trichorzianine synthetase
NRPS2	10579, 47933, 47989, 48079, 48302, 48550, 48578, 48813	Peptaibol synthetase, fragmented
NRPS3	52560	cyclopentapeptide synthetase
NRPS4	88396	Ferrichrome type synthetase, also present in H. jecorina
NRPS5	30015	Cyclodepsipeptide synthetase
NRPS6	154060	Predicted NRPS, missing in H. jecorina and T. virens; presumably incomplete, preceding TC-domains, 3079 ORF
NRPS7	77514	GliP-like, cyclodipeptide, related NRPS in H. jecorina
NRPS8	39904	Predicted dipeptide synthetase
NRPS9	39887	Possible siderophore synthetase, also present in H. jecorina
NRPS10	94288	Fragment?
NRPS11	32223
NRPS12	13868, 43928*	similarity to HC-toxin of Pyrenophora, fragmented
NRPS 13	40716
NRPS14	10385	unique
NRPS15	40037	present in H. jecorina
NRPS16	139895	present in H. jecorina
NRPS-PKS	51715
PKS1	45485	Iterative type I PKS
PKS2	79482
PKS3	146945
PKS4	32458	Iterative type I PKS
PKS5	52962
PKS6	45973
PKS7	83179
PKS8	85006	Related to alternapyrone or mycocerosic acid biosynthesis
PKS9	51909
PKS10	134224
PKS11	51503
PKS12	33843	Iterative type I PKS
PKS13	33092	Iterative type I PKS
PKS14	51726
PKS15	31567	Predicted 6-MSA synthetase
PKS16	79	conidial pigment formation PKS
PKS17	80219
PKS18	45540	Predicted 6-MSA synthetase

## Sheet: Table S10
Table S10. NRPS, PKS and NRPS-PKS proteins in T. virens
Name	Protein ID	Comments
Nrps1	66940	Trichovirin synthetase TEX1
Nrps2	10003	14-peptaibol synthetase
Nrps3	69362	Possible heptapeptide synthetase, adjacent PKS 49800, possibly supplying starter
Nrps4	68823	Cyclohexapeptide synthetase, product contains 3 D-amino acids (AA)
Nrps5	70770	Cyclohexapeptide synthetase, product contains 1 D-AA
Nrps6	62540	Cyclohexapeptide synthetase, product with 1 D-AA and 2 N-Me-AAs
Nrps7	68467	Cyclopentapeptide synthetase, product is N-methylated at positions 1, 2 and 4
Nrps8	52861	cyclopentapeptide
Nrps9	70138+51630	Data incomplete, fragmented
Nrps10	70819	Cyclotetrapeptide synthetase, product with 1 D-AA
Nrps11	85582	Siderophore synthetase
Nrps12	46961	Cyclodepsipeptide synthetase
Nrps13	70742	Cyclodipeptide synthetase
Nrps14	78708	Cyclodipeptide synthetase
Nrps15	68739	Cyclodipeptide synthetase (incomplete ?)
Nrps16	70206	Siderophore synthetase SidD
Nrps17	70819
Nrps18	70629	fragment?
Nrps19	39004
Nrps20	41206	Fragment?
Nrps22	65547
Nrps23	512
Nrps24	50383
Nrps25	44320
Nrps26	51630
Nrps27	37142	Fragment?
Nrps28	36682	fragment ?
Nrps-Pks1	53833
Nrps-Pks2	48850
Nrps-Pks3	47905
Nrps-Pks4	28610	Mixed PKS, FUSS-related
PKS1	53318	Iterative type I PKS
PKS2	51004	Related to iterative type I polyketide synthase of Solorina crocea
PKS3	35498
PKS4	47828	Polyketide synthase, putative
PKS5	53633
PKS6	41840	Putative polyketide synthase, has 43% identity with Fum1p of Gibberella moniliformis
PKS7	70876	Polyketide synthase, putative
PKS8	47407	Polyketide synthase, putative
PKS9	62549	Polyketide synthase, putative
PKS10	64883	Polyketide synthase, putative
PKS11	42255	Polyketide synthase, putative
PKS12	29151	Polyketide synthase, putative
PKS13	53926	Polyketide synthase, putative
PKS14	77826	Conidial pigment PKS
PKS15	20101
PKS 16	10060
PKS 17	39352
PKS 18	49800	may supply starter for NRPS3

[truncated: 9 more sheets: Table S11, Table S12, Table S13, Table S14, Table S15, Table S16, Table S17, Table S18, Table S19]
